# Supplementary material
Source: Springer Nature journal article supplement (https://www.springermedizin.de/resource/supplementary/12943_2010_710_MOESM5_ESM.pdf/9554630)

**A**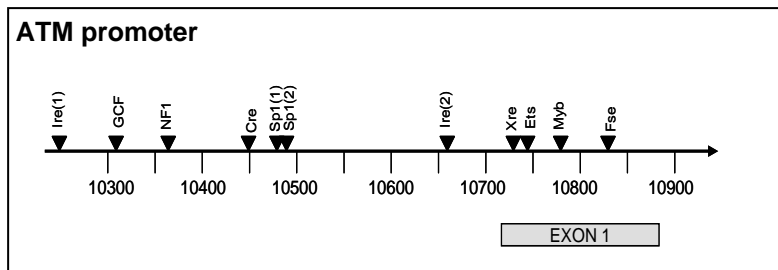**B**

**p63-dependent ATM promoter stimulation requires an NF-1 site**

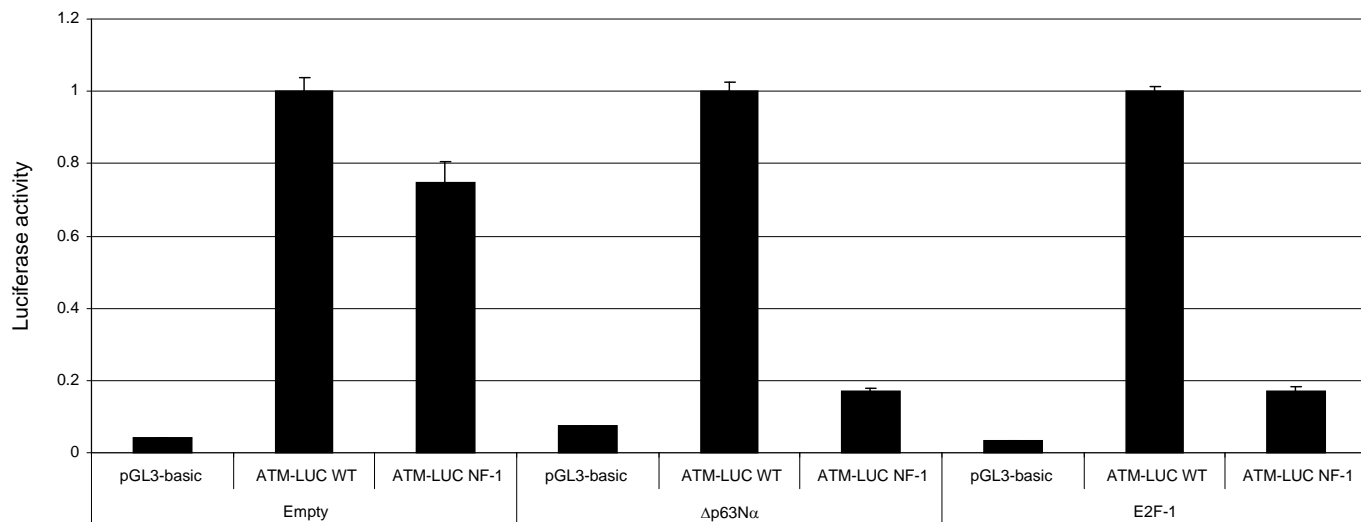**C**

**Additive effect of p63 and E2F-1 on ATM promoter**

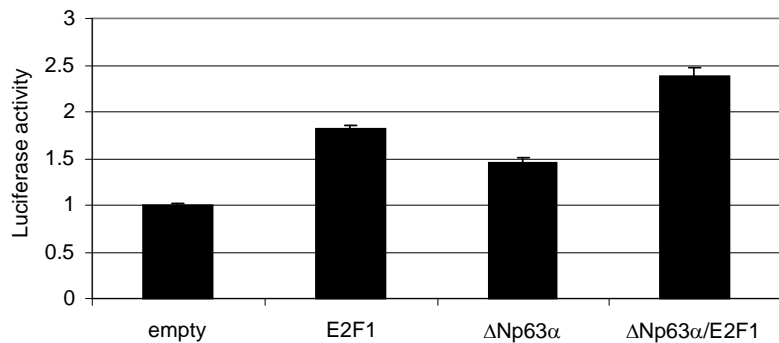

Supplement: MOESM5 [file 9554630]
